# Supplementary material
Source: PubMed Central journal article supplement (PMC5154488)
Supplement: mt2016192x1.pdf [file mt2016192x1.pdf]

**Supplementary Table S1 Top ten genome-wide off-target sites used in this study**

|      | Sequence                           | Score | Mismatches       | Locus           |
|------|------------------------------------|-------|------------------|-----------------|
| OT1  | GGCTGTGGAGTGCATGTGCGA <u>AAGGT</u> | 5.0   | 2MMs [8:10]      | chr10:-79469902 |
| OT2* | TGCATTGTAATGCATGTGCAC <u>CAGGG</u> | 0.7   | 4MMs [1:4:5:20]  | chr13:-12962821 |
| OT2* | TGCATTGTAATGCATGTGCAC <u>CAGGG</u> | 0.7   | 4MMs [1:4:5:20]  | chr13:-13174810 |
| OT2* | TGCATTGTAATGCATGTGCAC <u>CAGGG</u> | 0.7   | 4MMs [1:4:5:20]  | chr13:+13206983 |
| OT2* | TGCATTGTAATGCATGTGCAC <u>CAGGG</u> | 0.7   | 4MMs [1:4:5:20]  | chr13:-27869407 |
| OT3  | TGCAGTGTAGTGCATGTGCAC <u>CAGGG</u> | 0.7   | 4MMs [1:4:10:20] | chr4:-152973806 |
| OT4  | GACTGTGCACTGCATGTGCC <u>AGGGT</u>  | 0.6   | 4MMs [2:8:10:20] | chr1:-134765564 |
| OT5  | GGCAATGCAATGCATGTGAGT <u>GGTC</u>  | 0.5   | 4MMs [4:5:8:19]  | chr9:-115822056 |
| OT6  | GCGTGTGTGAGGCATGTGCG <u>AGGCA</u>  | 0.5   | 4MMs [2:3:9:11]  | chr15:-99017711 |
| OT7  | GCCTGTGCAGTGCATGTGTG <u>GAGAC</u>  | 0.5   | 4MMs [2:8:10:19] | chr1:+94173408  |

Off-target sites were predicted using the CRISPR Design server (<http://crispr.mit.edu>). Ten sites were chosen based on sequence similarity. PAM sequences are underlined.

\*Duplicated region in the annotated mouse genome.
