# Supplementary material
Source: PubMed Central journal article supplement (PMC5154488)
Supplement: mt2016192x2.pdf [file mt2016192x2.pdf]

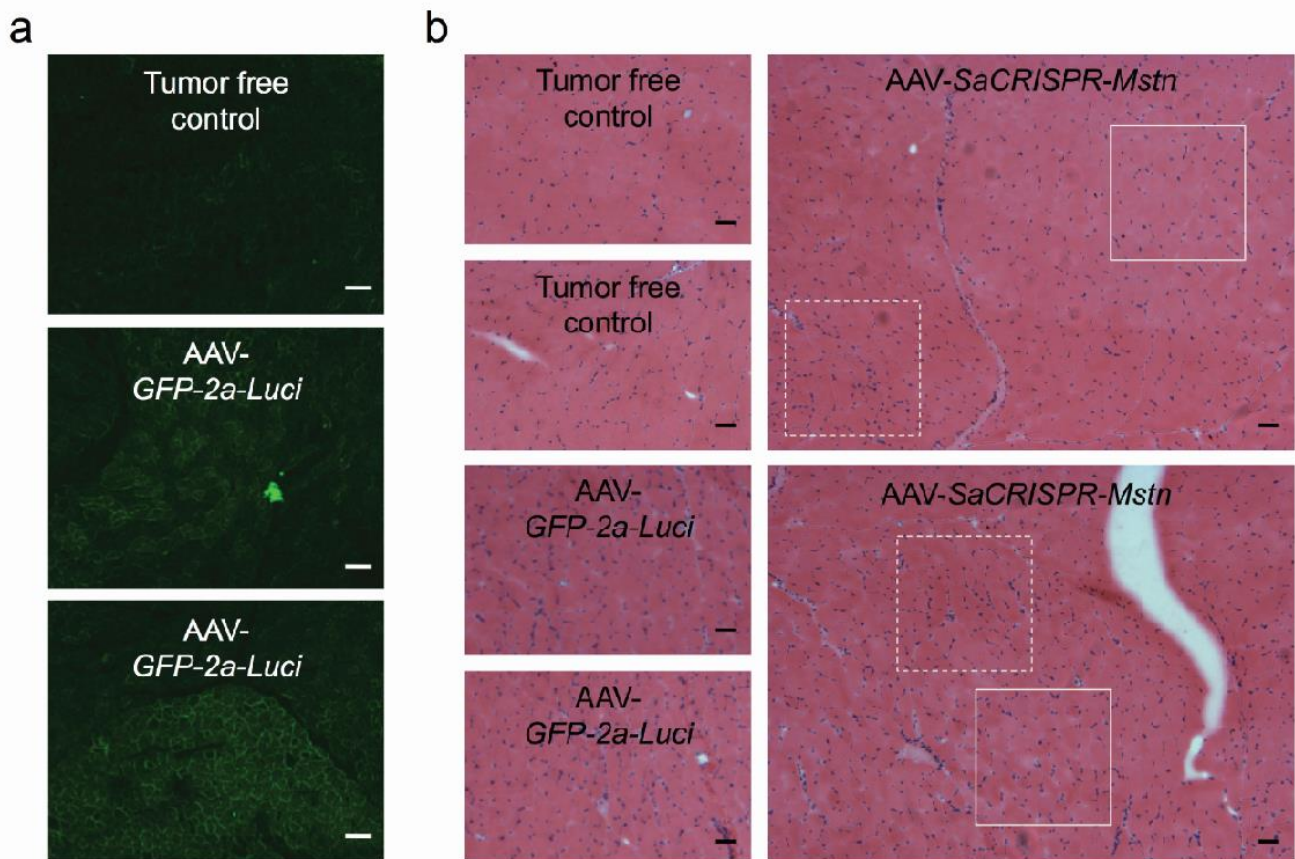

**Supplemental Figure 1** Effects of targeting the *Mstn* gene in skeletal muscle cells in mice with cancer-associated muscle atrophy. (a) Immunostaining with GFP antibody (Invitrogen, A21311, 1:100) of cross-sectional areas of gastrocnemius muscles of representative mice from indicated groups at week 8. Scale bar = 500  $\mu$ m. (b) Hematoxylin/eosin stains of cross-sectional areas of gastrocnemius muscles of representative mice from indicated groups at week 8. Scale bar = 200 $\mu$ m. Areas with alleviated atrophy are indicated by full-line boxes; areas with severe atrophy are indicated by dotted-line boxes.
